# Supplementary material
Source: PubMed Central journal article supplement (PMC8677628)
Supplement: mmc1.pdf [file mmc1.pdf]

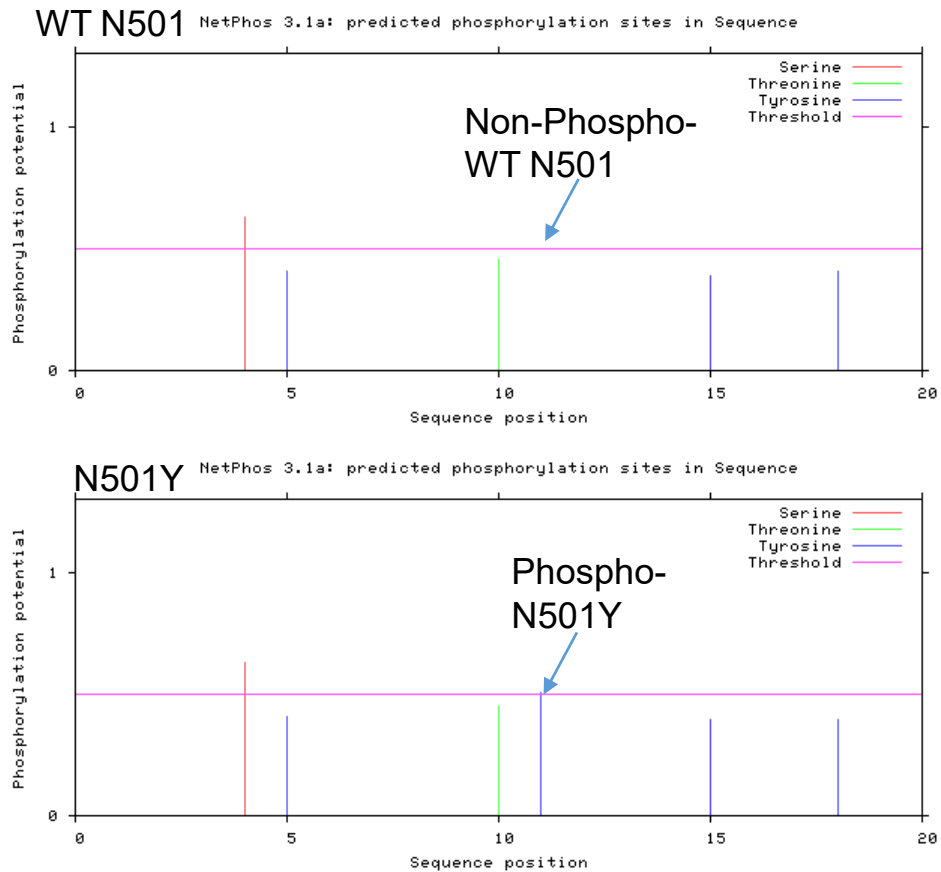

Fig. S1 Predicted kinases for the phosphorylation in position N501Y of mutated SARS-CoV-2 spike receptor-binding domain by NetPhos 3.1. Arrow shows the phosphorylation at N501Y but not at N501 wild type (WT).

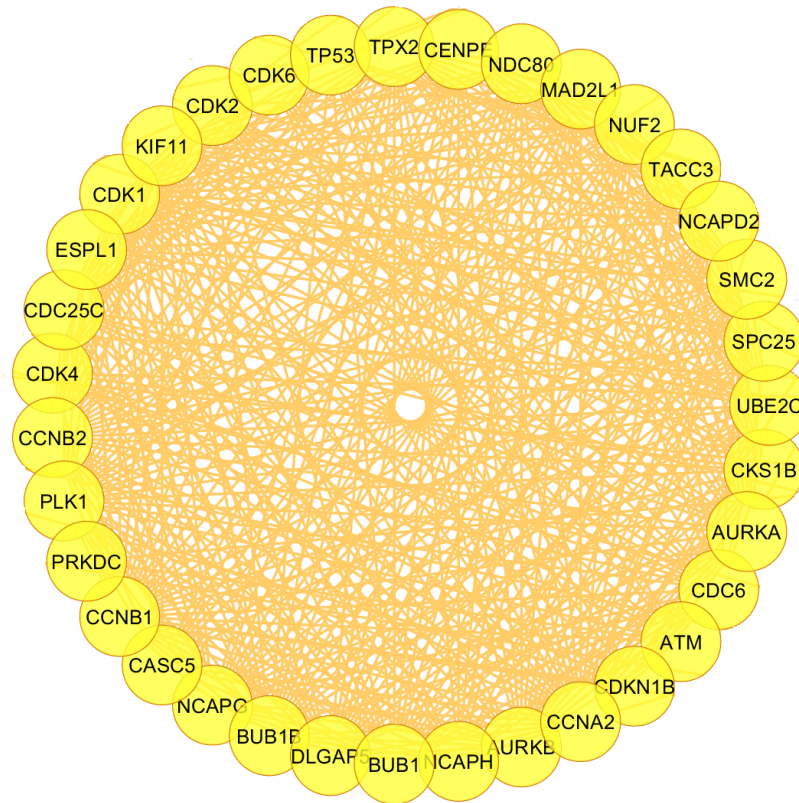

Fig. S2. Possible gain of phosphorylation of B.1.1.7 lineage. Protein-protein interaction Analysis. (a) The network of PPI was derived from STRING database and retrieved by Cytoscape 7.3 software. ClusterONE plug-in of Cytoscape 7.3 was used to identify the most significant cluster (nodes - 35; density – 0.699; p-value - <0.000). Proteins are represented by nodes, while their associations are by edges.

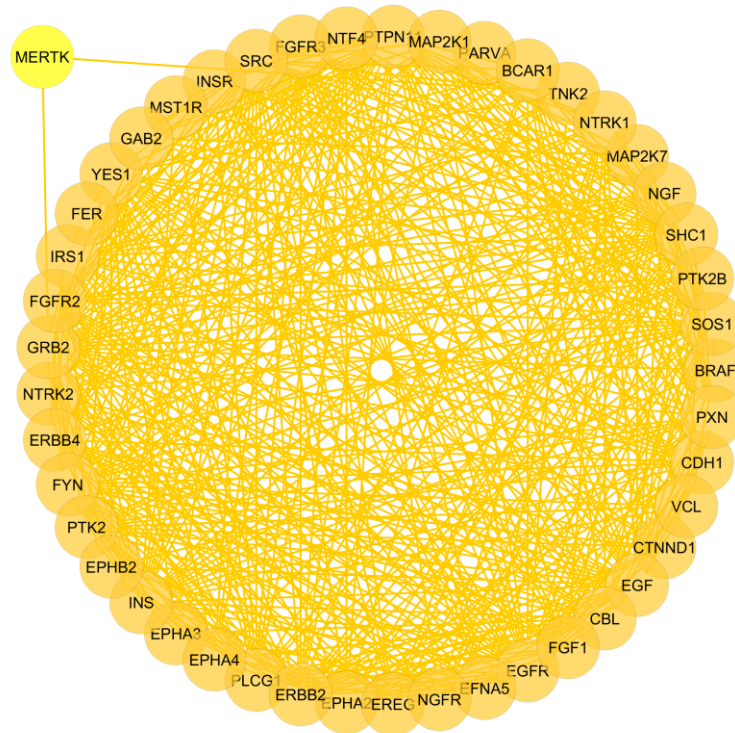

Fig. S3. Possible gain of phosphorylation of B.1.351 lineage. Protein-protein interaction analysis of the network of was derived from STRING database [1] and retrieved by Cytoscape 7.3 software [2]. ClusterONE plug-in of Cytoscape 7.3 was used to identify the most significant cluster (nodes - 45; density – 0.498; p-value - <0.000). Proteins are represented by nodes, while their associations are by edges.

# Reference

1. Yan Y, Tao H, He J, Huang S-Y.\* The HDock server for integrated protein-protein docking. *Nature Protocols*, 2020; doi: <https://doi.org/10.1038/s41596-020-0312-x>.
2. Larsson, P., Skwark, M. J., Wallner, B. & Elofsson, A. Assessment of global and local model quality in CASP8 using Pcons and ProQ. *Proteins* 77(Suppl 9), 167–172 (2009).
3. Jumper, J. et al. Highly accurate protein structure prediction with AlphaFold. *Nature* <https://doi.org/10.1038/s41586-021-03819-2> (2021).
4. B. Webb, A. Sali. *Comparative Protein Structure Modeling Using Modeller*. *Current Protocols in Bioinformatics* 54, John Wiley & Sons, Inc., 5.6.1-5.6.37, 2016.
5. Szklarczyk D, Gable AL, Lyon D, Junge A, Wyder S, Huerta-Cepas J, et al. STRING v11: protein–protein association networks with increased coverage, supporting functional discovery in genome-wide experimental datasets. *Nucleic Acids Res* 47, 607–13 (2018).
6. Shannon P, Markiel A, Ozier O, Baliga NS, Wang JT, Ramage D, et al. Cytoscape: a software environment for integrated models of biomolecular interaction networks. *Genome Res* 13, 2498–504 (2003).
7. Xie C, Mao X, Huang J, Ding Y, Wu J, Dong S, et al. KOBAS 2.0: a web server for annotation and identification of enriched pathways and diseases. *Nucleic Acids Res* 39, W316–W322 (2011).
8. Origin(Pro), Version Number (e.g. "Version 2021"). OriginLab Corporation, Northampton, MA, USA (2021).
9. Kelley LA et al. The Phyre2 web portal for protein modeling, prediction and analysis. *Nature Protocols* 10, 845-858 (2015).
